# Supplementary material for: Atrial myocyte-derived exosomal microRNA contributes to atrial fibrosis in atrial fibrillation
Source: Springer Nature journal article supplement (doi:10.1186/s12967-022-03617-y), 2022-09-05
Supplement: MOESM1 [file 23455008]

**Table S1. The sequences of primers designed for qRT-PCR.**

| Gene          | Sense          | Sequence                      |
|---------------|----------------|-------------------------------|
| $\alpha$ -SMA | Forward primer | 5'-GTCCCAGACATCAGGGAGTAA-3'   |
|               | Reverse primer | 5'-TCGGATACTTCAGCGTCAGGA-3'   |
| CollagenI     | Forward primer | 5'-GAGCGGAGAGTACTGGATCGA-3'   |
|               | Reverse primer | 5'-CTGACCTGTCTCCATGTTGCA-3'   |
| CollagenIII   | Forward primer | 5'-TGGCACAGCAGTCCAATGTAC-3'   |
|               | Reverse primer | 5'-GACAGATCCCGAGTCGCAGA-3'    |
| TGF $\beta$ 1 | Forward primer | 5'-ATTCAAGTCAACTGTGGAGCAAC-3' |
|               | Reverse primer | 5'-CGAAAGCCCTGTATTCCGTCT-3'   |
| GPD1L         | Forward primer | 5'-CCCCTGAAAGTGTGCATCGT-3'    |
|               | Reverse primer | 5'-GGCAGCTTGTGTCCAGGAA-3'     |
| Col11a2       | Forward primer | 5'-GATGAGCTGAGCCCTGAGAC-3'    |
|               | Reverse primer | 5'-CCAGGTCTGAGAAGGAAGCA-3'    |
| GAPDH         | Forward primer | 5'-GACATCAAGAAGGTGGTGAAGC-3'  |
|               | Reverse primer | 5'-TGTCATTGAGAGCAATGCCAGC-3'  |

**Table S2. General clinical characteristics of patients.**

|              | Ctr patients<br>(n=50) | AF patients<br>(n=50) | P (value) |
|--------------|------------------------|-----------------------|-----------|
| Age (years)  | 60.70±8.23             | 62.26±8.04            | 0.359     |
| Male (n)     | 32                     | 36                    | 0.396     |
| HBP, n (%)   | 28(56)                 | 27(54)                | 0.842     |
| DM, n (%)    | 18(36)                 | 13(26)                | 0.284     |
| CHD, n (%)   | 24(48)                 | 23(46)                | 0.843     |
| HF, n (%)    | 7(14)                  | 10(20)                | 0.429     |
| Smoke, n (%) | 22(44)                 | 26(52)                | 0.428     |

Data are presented as mean±SD, n, % or median. HBP: hypertention; DM: diabetes mellitus; CHD: coronary heart disease; HF: heart failure.

**Table S3. Echocardiography and test results of patients.**

|               | Ctr patients<br>(n=50) | AF patients<br>(n=50) | P (value) |
|---------------|------------------------|-----------------------|-----------|
| TG (mmol/L)   | 1.69±0.79              | 1.91±0.76             | 0.379     |
| CHOL (mmol/L) | 4.66±0.83              | 4.19±1.07             | 0.079     |
| LDL (mmol/L)  | 2.83±0.60              | 2.62±0.87             | 0.303     |
| UA (umol/L)   | 315.0±54.58            | 354.4±69.63           | 0.246     |
| RAD (mm)      | 43.29±3.03             | 47.95±5.50            | 0.020     |
| LAD (mm)      | 36.12±3.44             | 40.27±4.42            | 0.003     |
| LVEF (%)      | 60.82±9.36             | 62.82±6.59            | 0.440     |

Data are presented as mean±SD, n, % or median. TG: triglyceride; CHOL: cholesterol; LDL: low density lipoprotein; UA: uric acid; RAD: right atrial diameter; LAD: left atrial diameter; LVEF: left ventricular ejection fraction.

**Table S4. Medication and surgery treatment of patients.**

|                         | Ctr patients<br>(n=50) | AF patients<br>(n=50) | P (value) |
|-------------------------|------------------------|-----------------------|-----------|
| Antiplatelet, n (%)     | 23(46)                 | 22(44)                | 0.842     |
| Statins, n (%)          | 20(40)                 | 23(46)                | 0.548     |
| $\beta$ -blocker, n (%) | 19(38)                 | 28(56)                | 0.072     |
| Amiodarone, n (%)       | 5(10)                  | 19(38)                | 0.001     |
| NOAC, n (%)             | 0(0)                   | 30(60)                | <0.001    |
| Digoxin, n (%)          | 4(8)                   | 15(30)                | 0.004     |
| CCB, n (%)              | 20(40)                 | 27(54)                | 0.164     |
| RFA, n (%)              | 0(0)                   | 19(38)                | <0.001    |
| PCI, n (%)              | 17(34)                 | 15(30)                | 0.671     |

Data are presented as mean $\pm$ SD, n, % or median. NOAC: novel oral anticoagulants; CCB: calcium channel blocker; RFA: radiofrequency ablation; PCI: percutaneous cardiac intervention.
