# Supplementary material for: Atrial myocyte-derived exosomal microRNA contributes to atrial fibrosis in atrial fibrillation
Source: Springer Nature journal article supplement (doi:10.1186/s12967-022-03617-y), 2022-09-05
Supplement: MOESM2 [file 23455008]

# Supplement figure 1

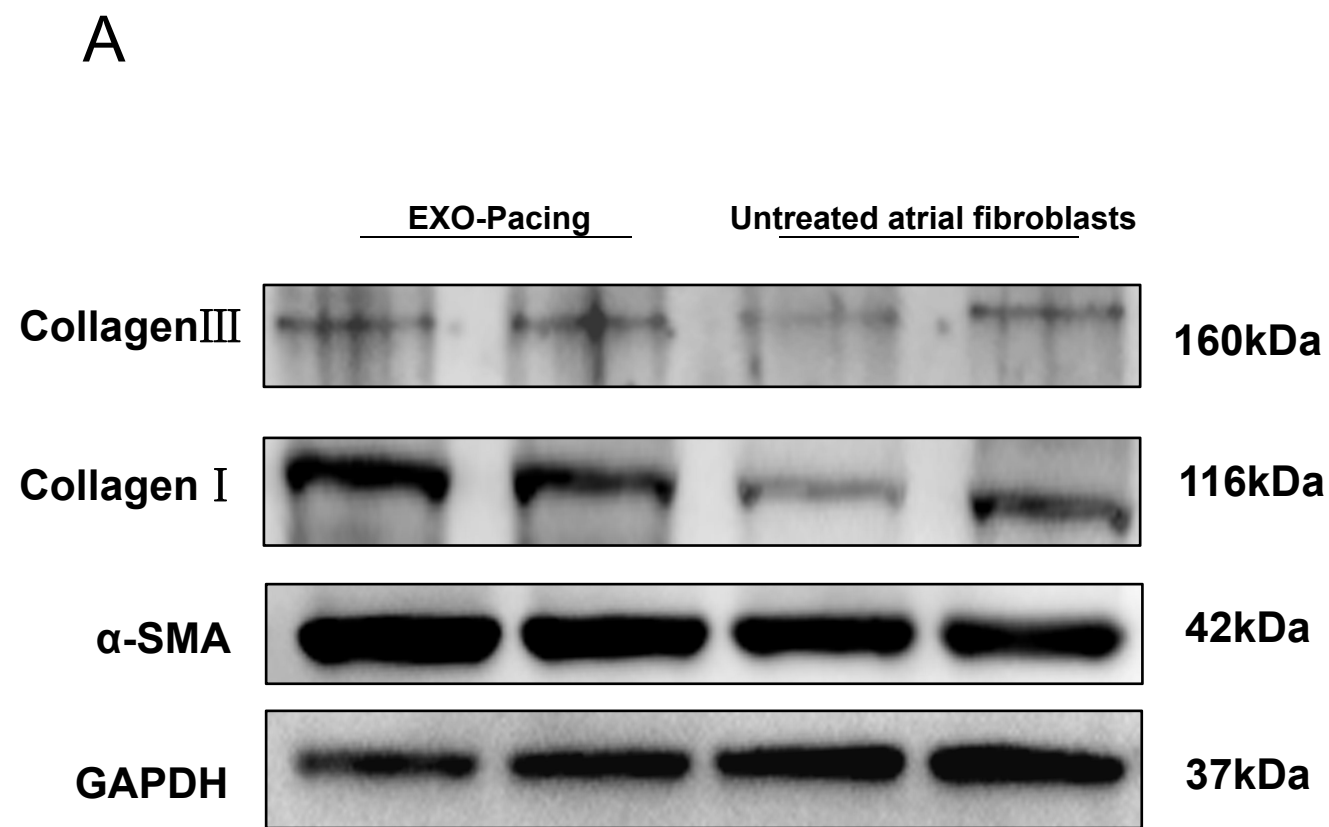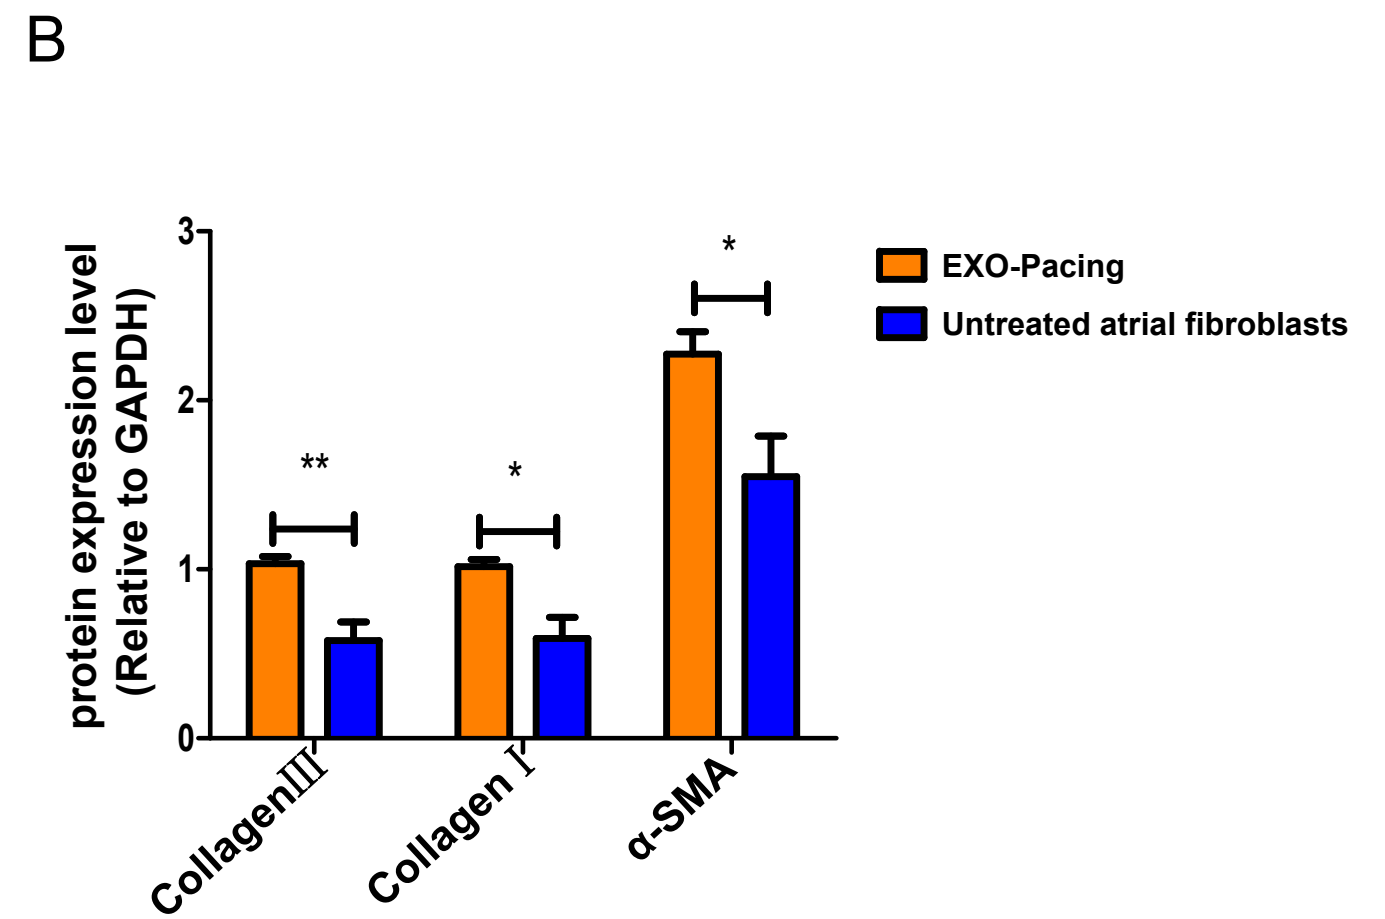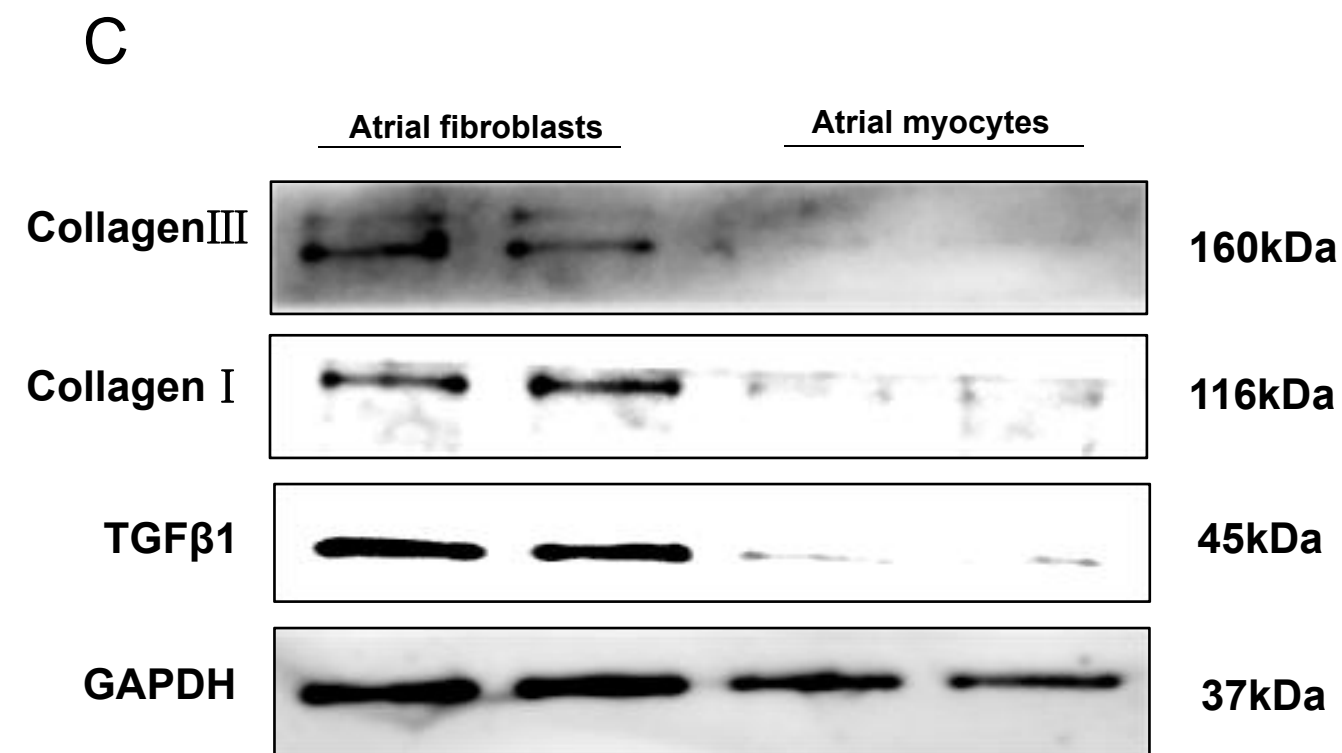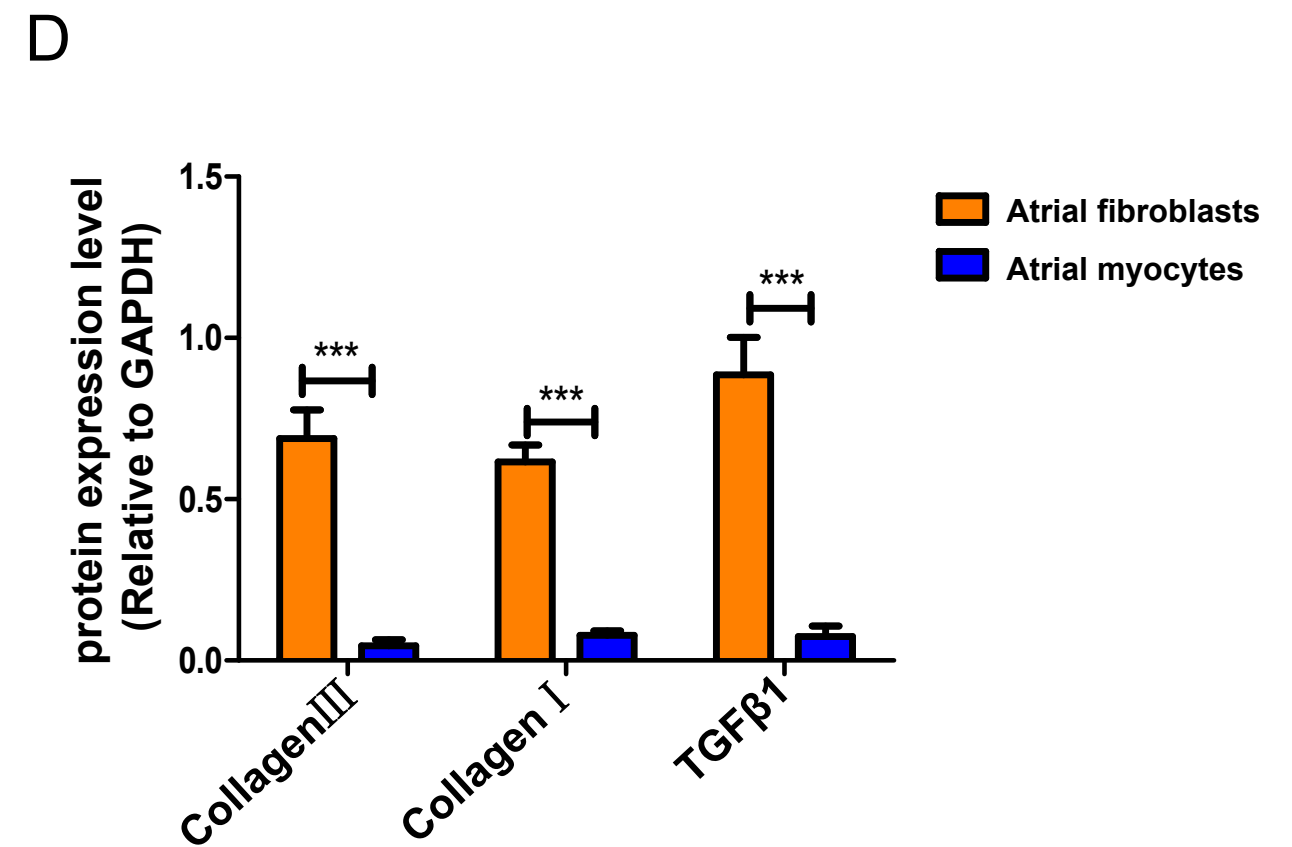

**The level of fibrotic protein in atrial fibroblasts.** (A, B) Western blot analysis of protein levels in EXO-Pacing and untreated atrial fibroblasts (\* $P$ <0.05 and \*\* $P$ <0.01). (C, D) Western blot analysis of protein levels in atrial fibroblasts and atrial myocytes. (\* $P$ <0.05, \*\*\* $P$ <0.001). The levels of fibrotic proteins in atrial fibroblasts.

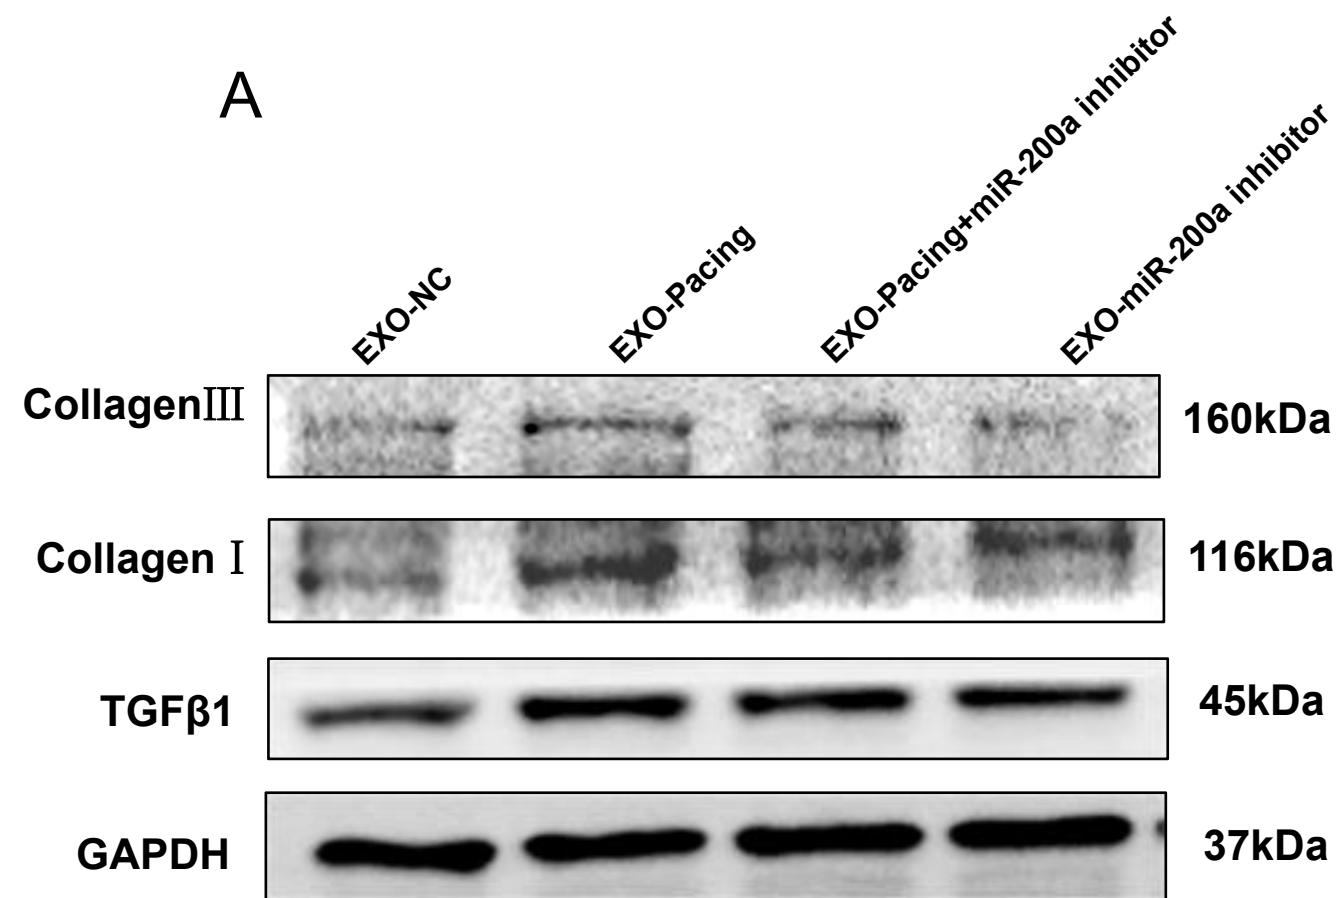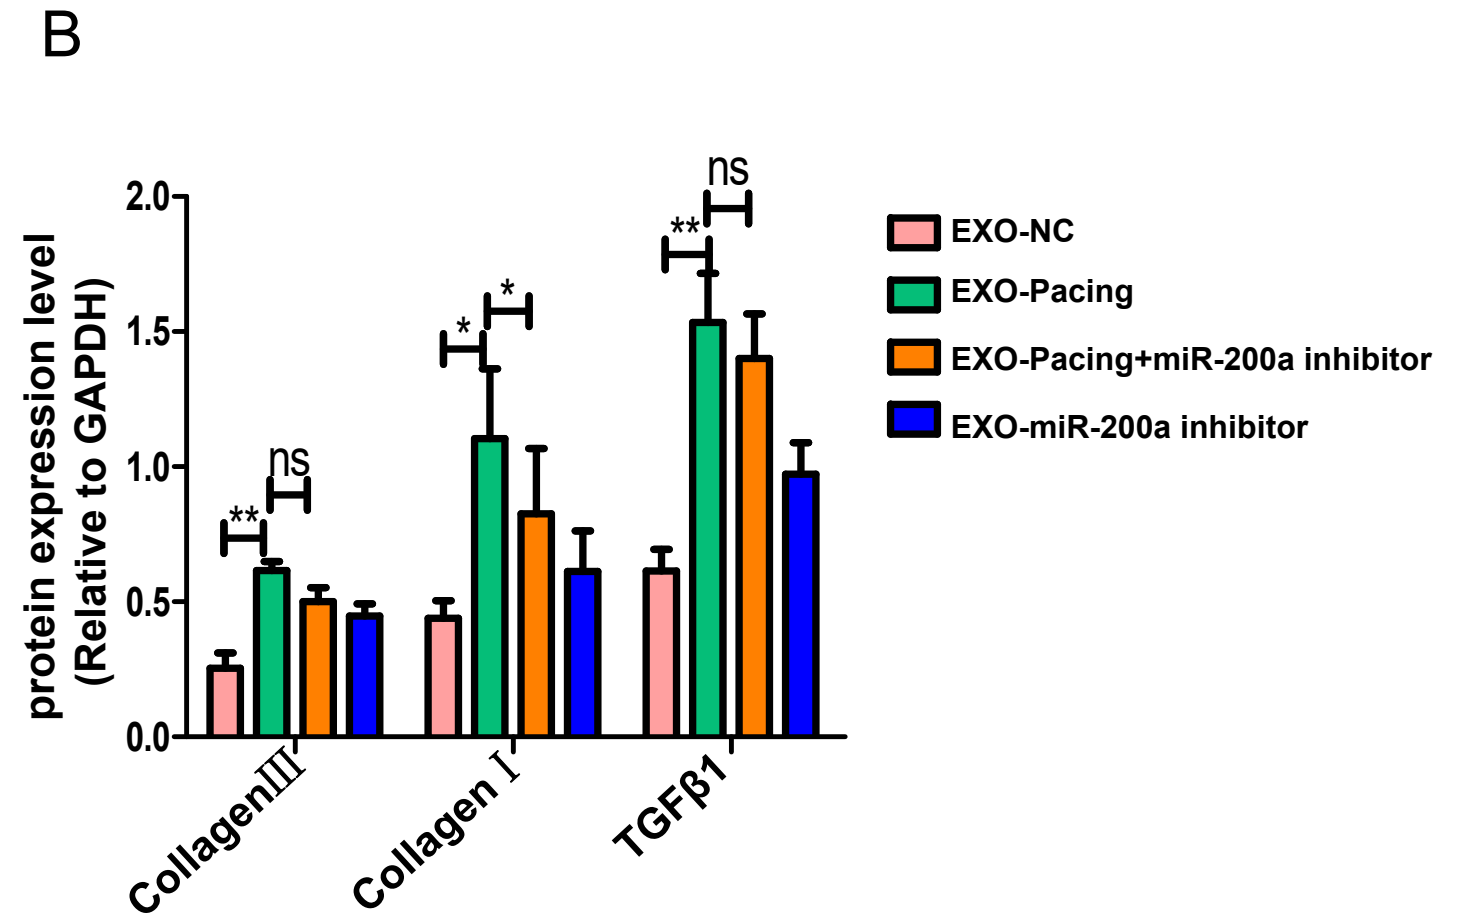

**The level of fibrotic protein in atrial fibroblasts.** (A, B) Western blot analysis of protein levels in atrial fibroblasts treated with exosomes derived from atrial myocytes (\* $P < 0.05$ , \*\* $P < 0.01$ ).

# Supplement figure 3

A

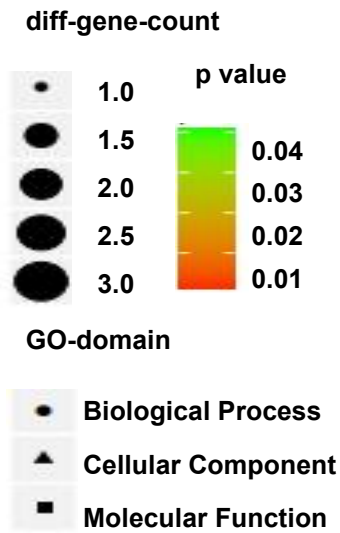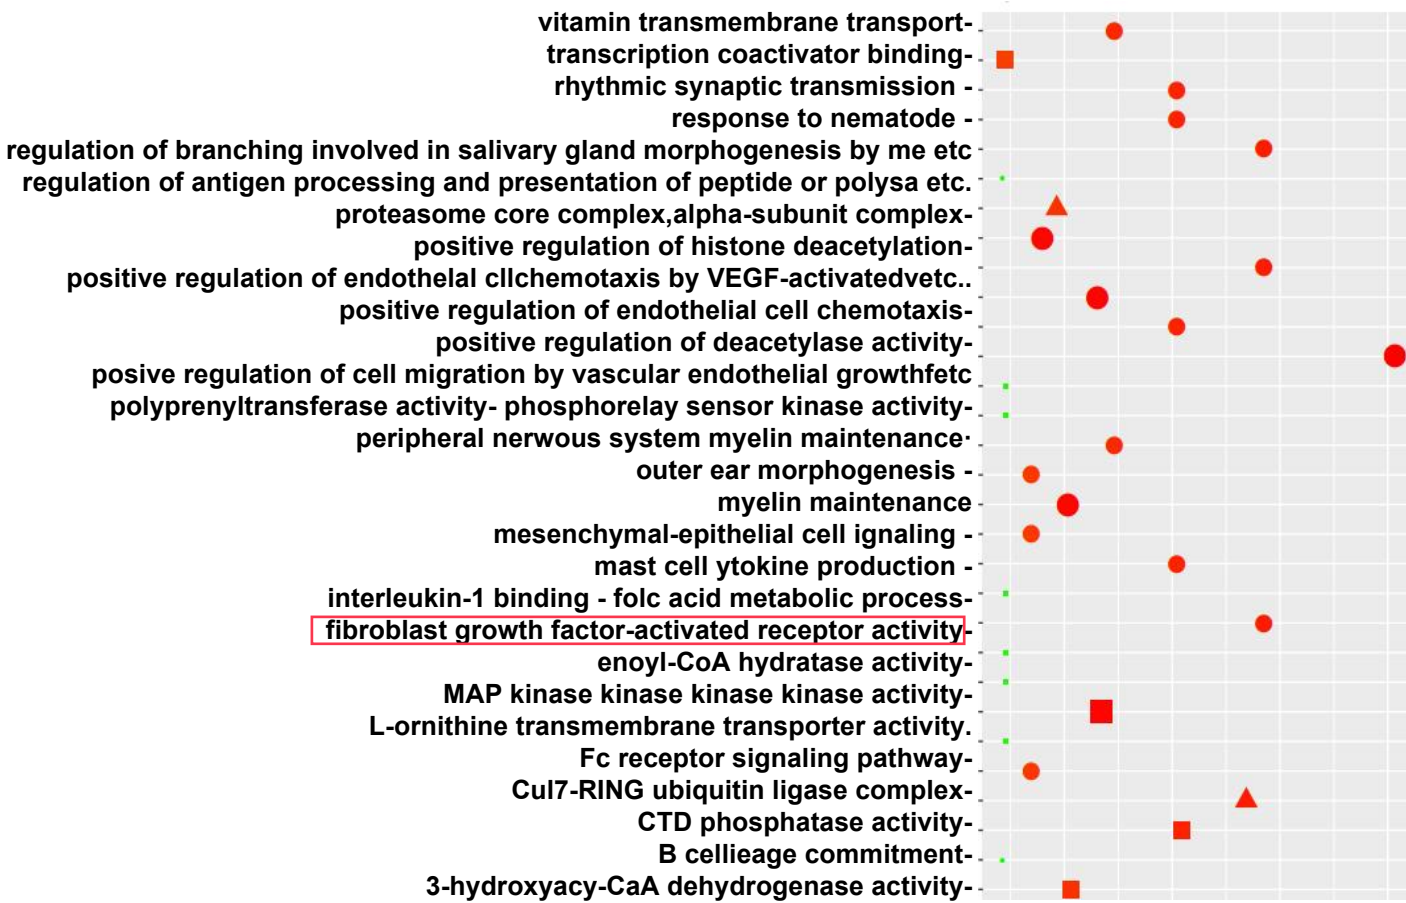

B

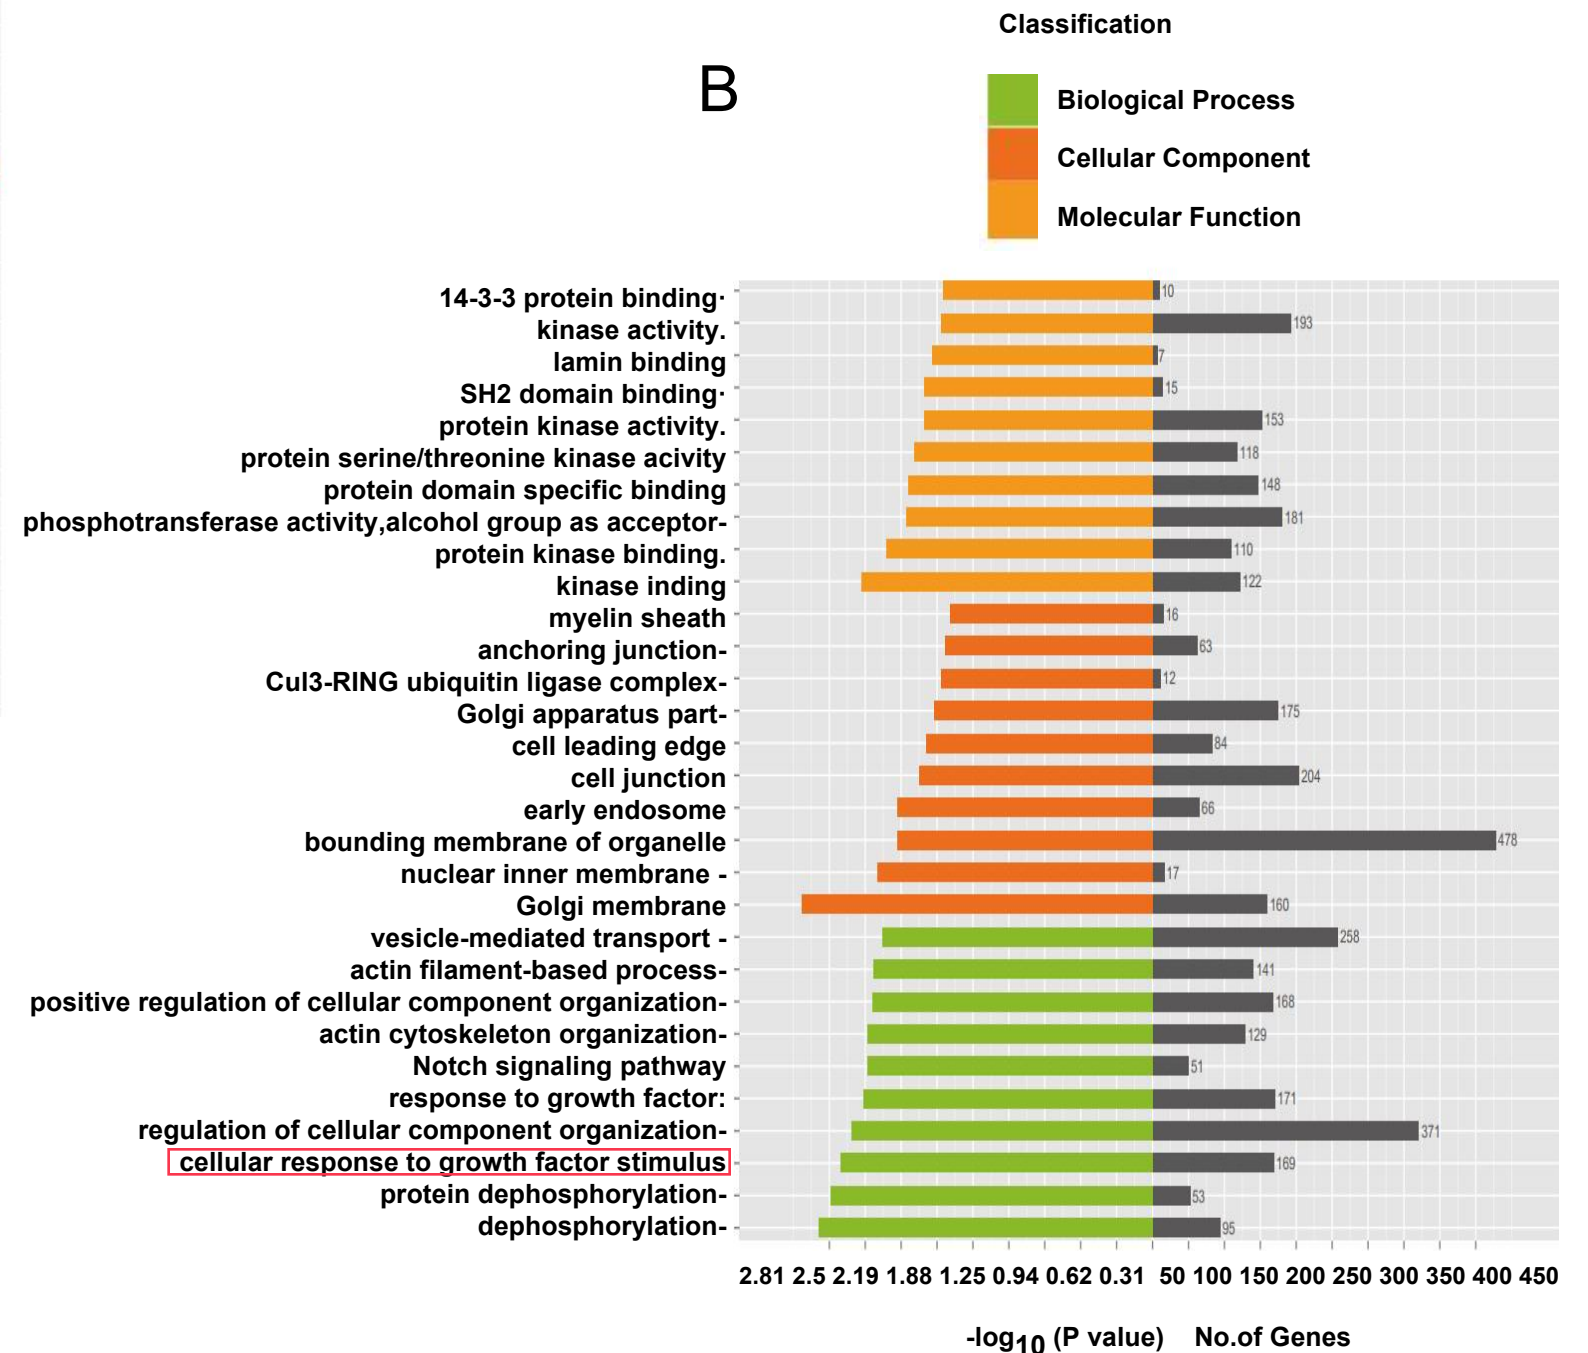

**Bioinformatics analysis on the relationship between miR-210-3p and fibroblast activity.** (A, B) GO analysis of the differentially expressed exosomal miR-210-3p derived from atrial myocytes showed enrichment in the regulation of proteins involved in fibroblast growth factor-activated receptor activity.

## Supplement figure 4

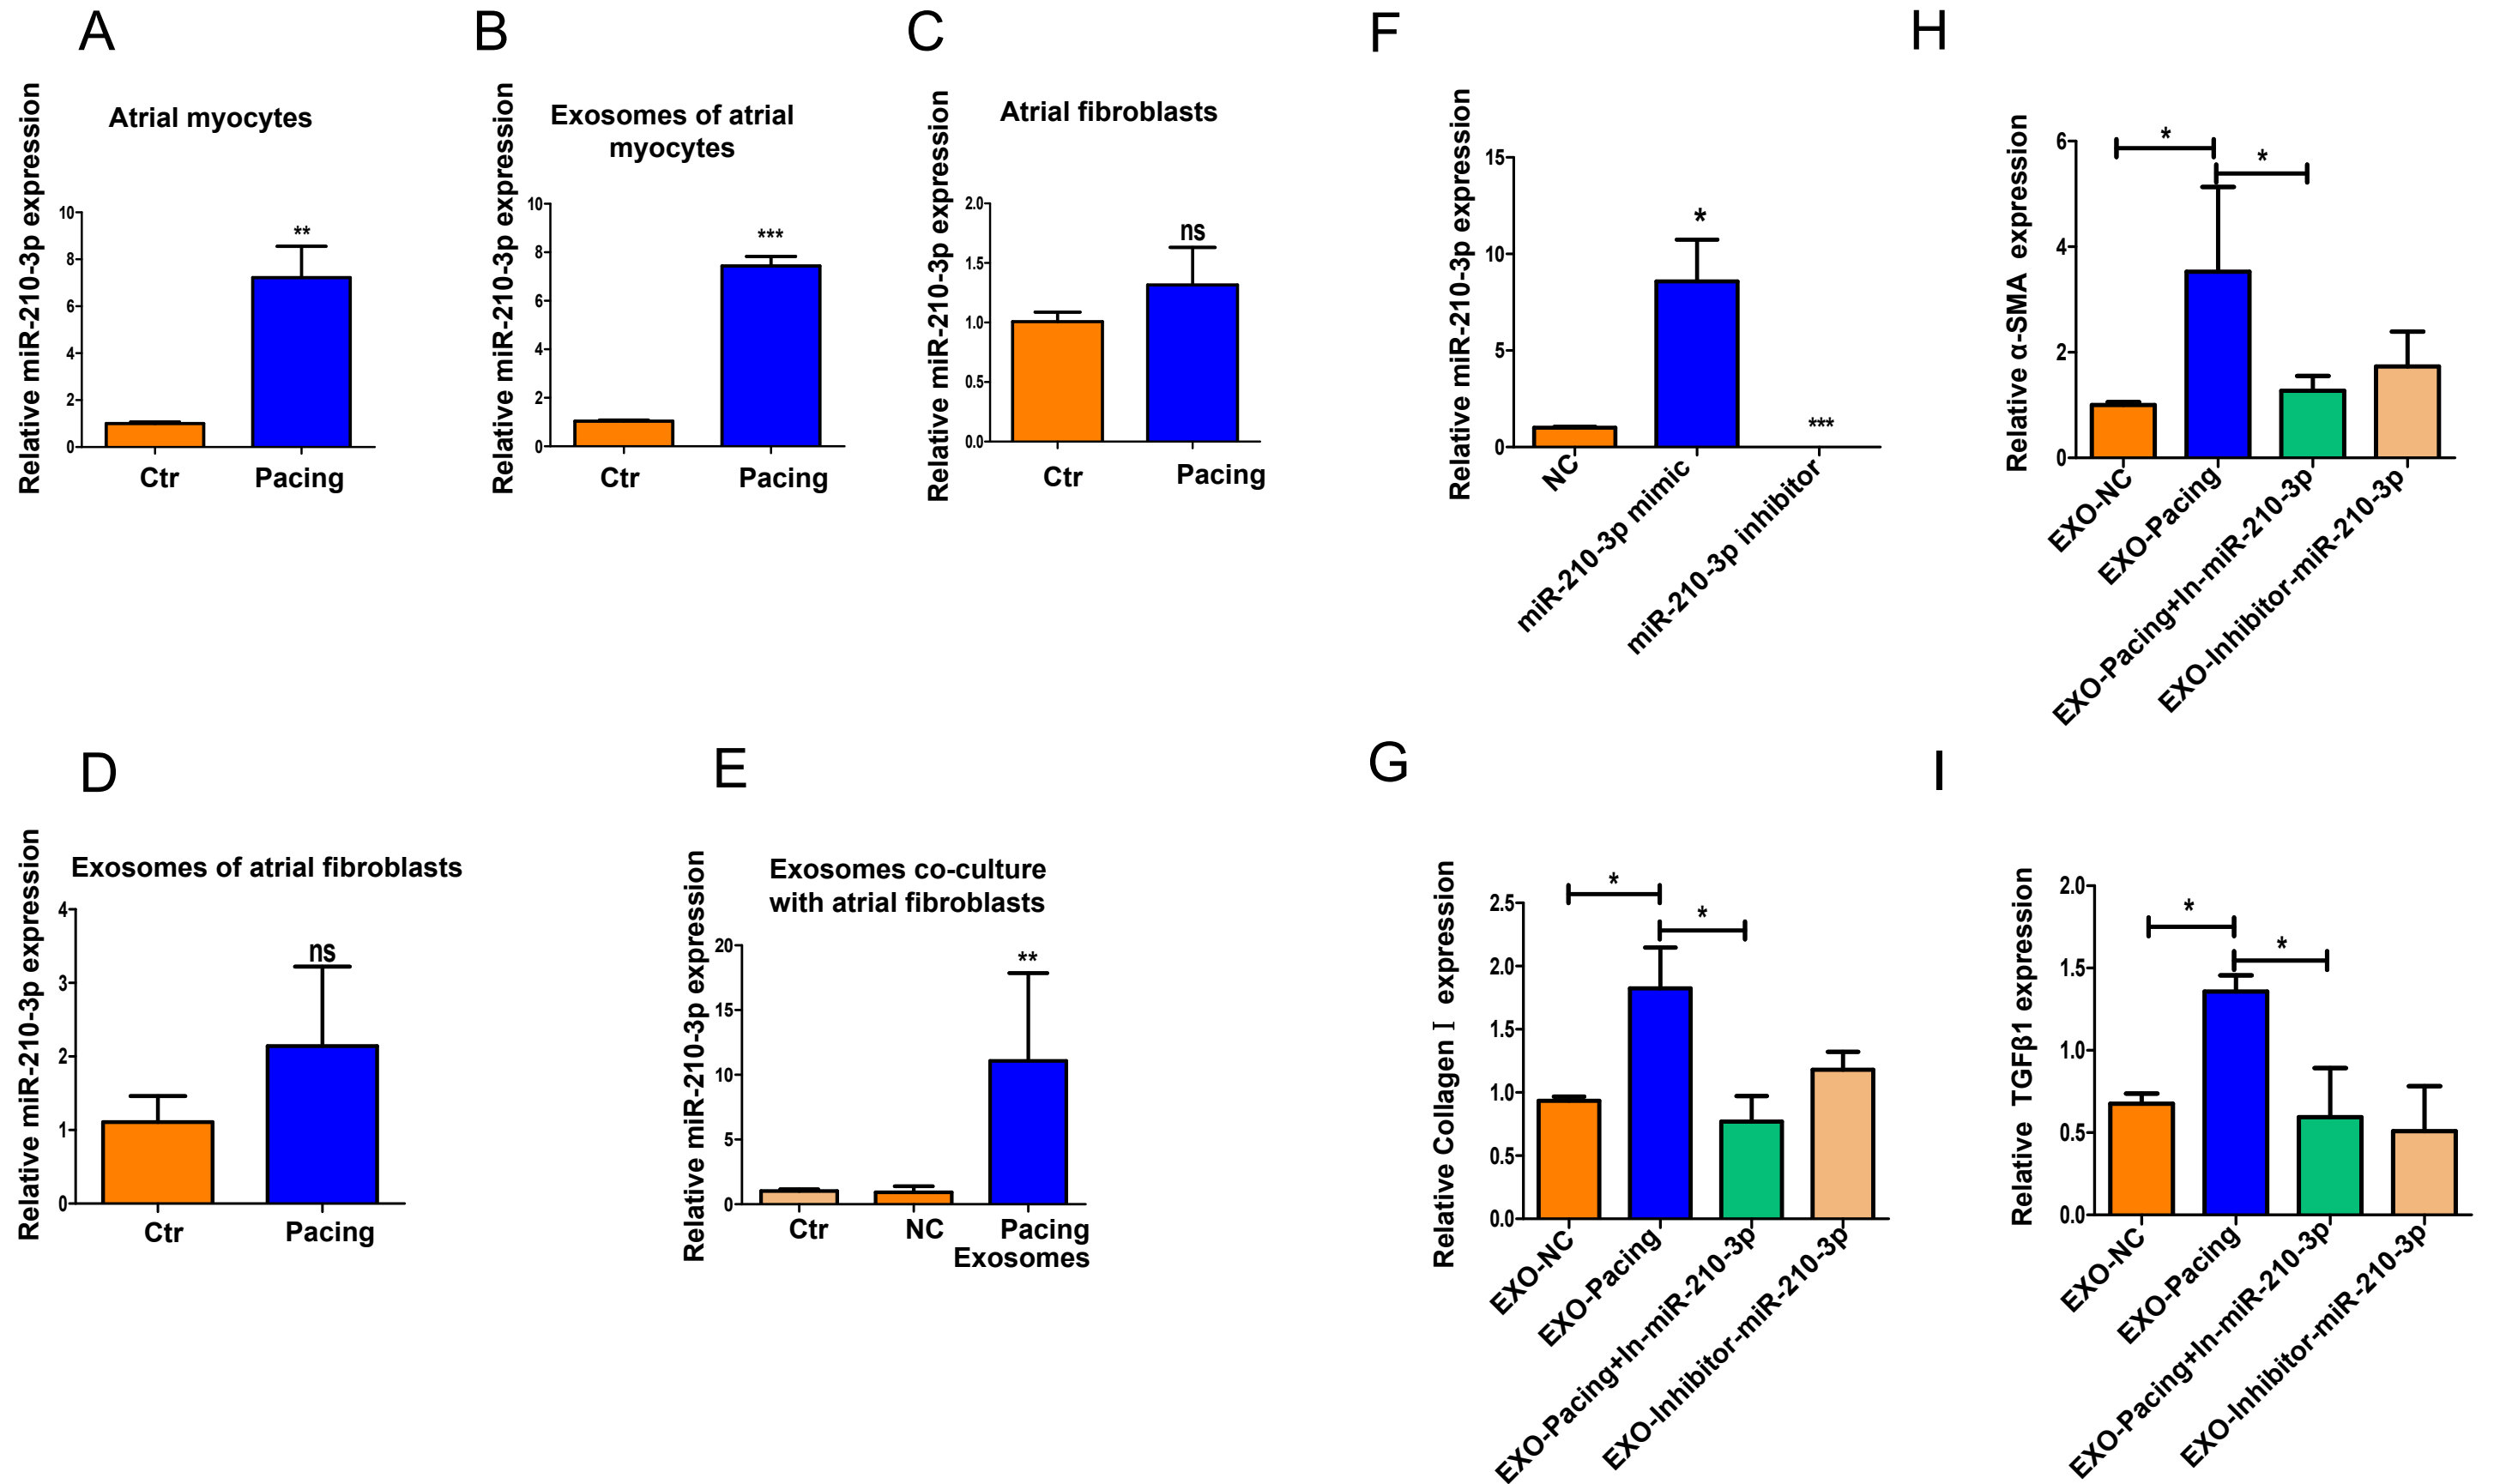

**qRT-PCR analysis of the differentially expressed miRNAs.** (A, B) Expression levels of miR-210-3p in atrial myocytes and atrial myocyte-derived exosomes. (C, D) Expression levels of miR-210-3p in atrial fibroblasts and atrial fibroblast-derived exosomes. (E) Coculture of atrial fibroblasts with exosomes derived from atrial myocytes (\*\* $P < 0.001$  compared with the Ctr and NC groups). (F) qRT-PCR analysis of the transfection efficiency of atrial myocytes (\* $P < 0.05$  and \*\* $P < 0.001$  compared with the Ctr group). (G-I) The mRNA levels of  $\alpha$ -SMA, collagen I and TGF $\beta$ 1 were evaluated using qRT-PCR (\* $P < 0.05$ ).

## Supplement figure 5

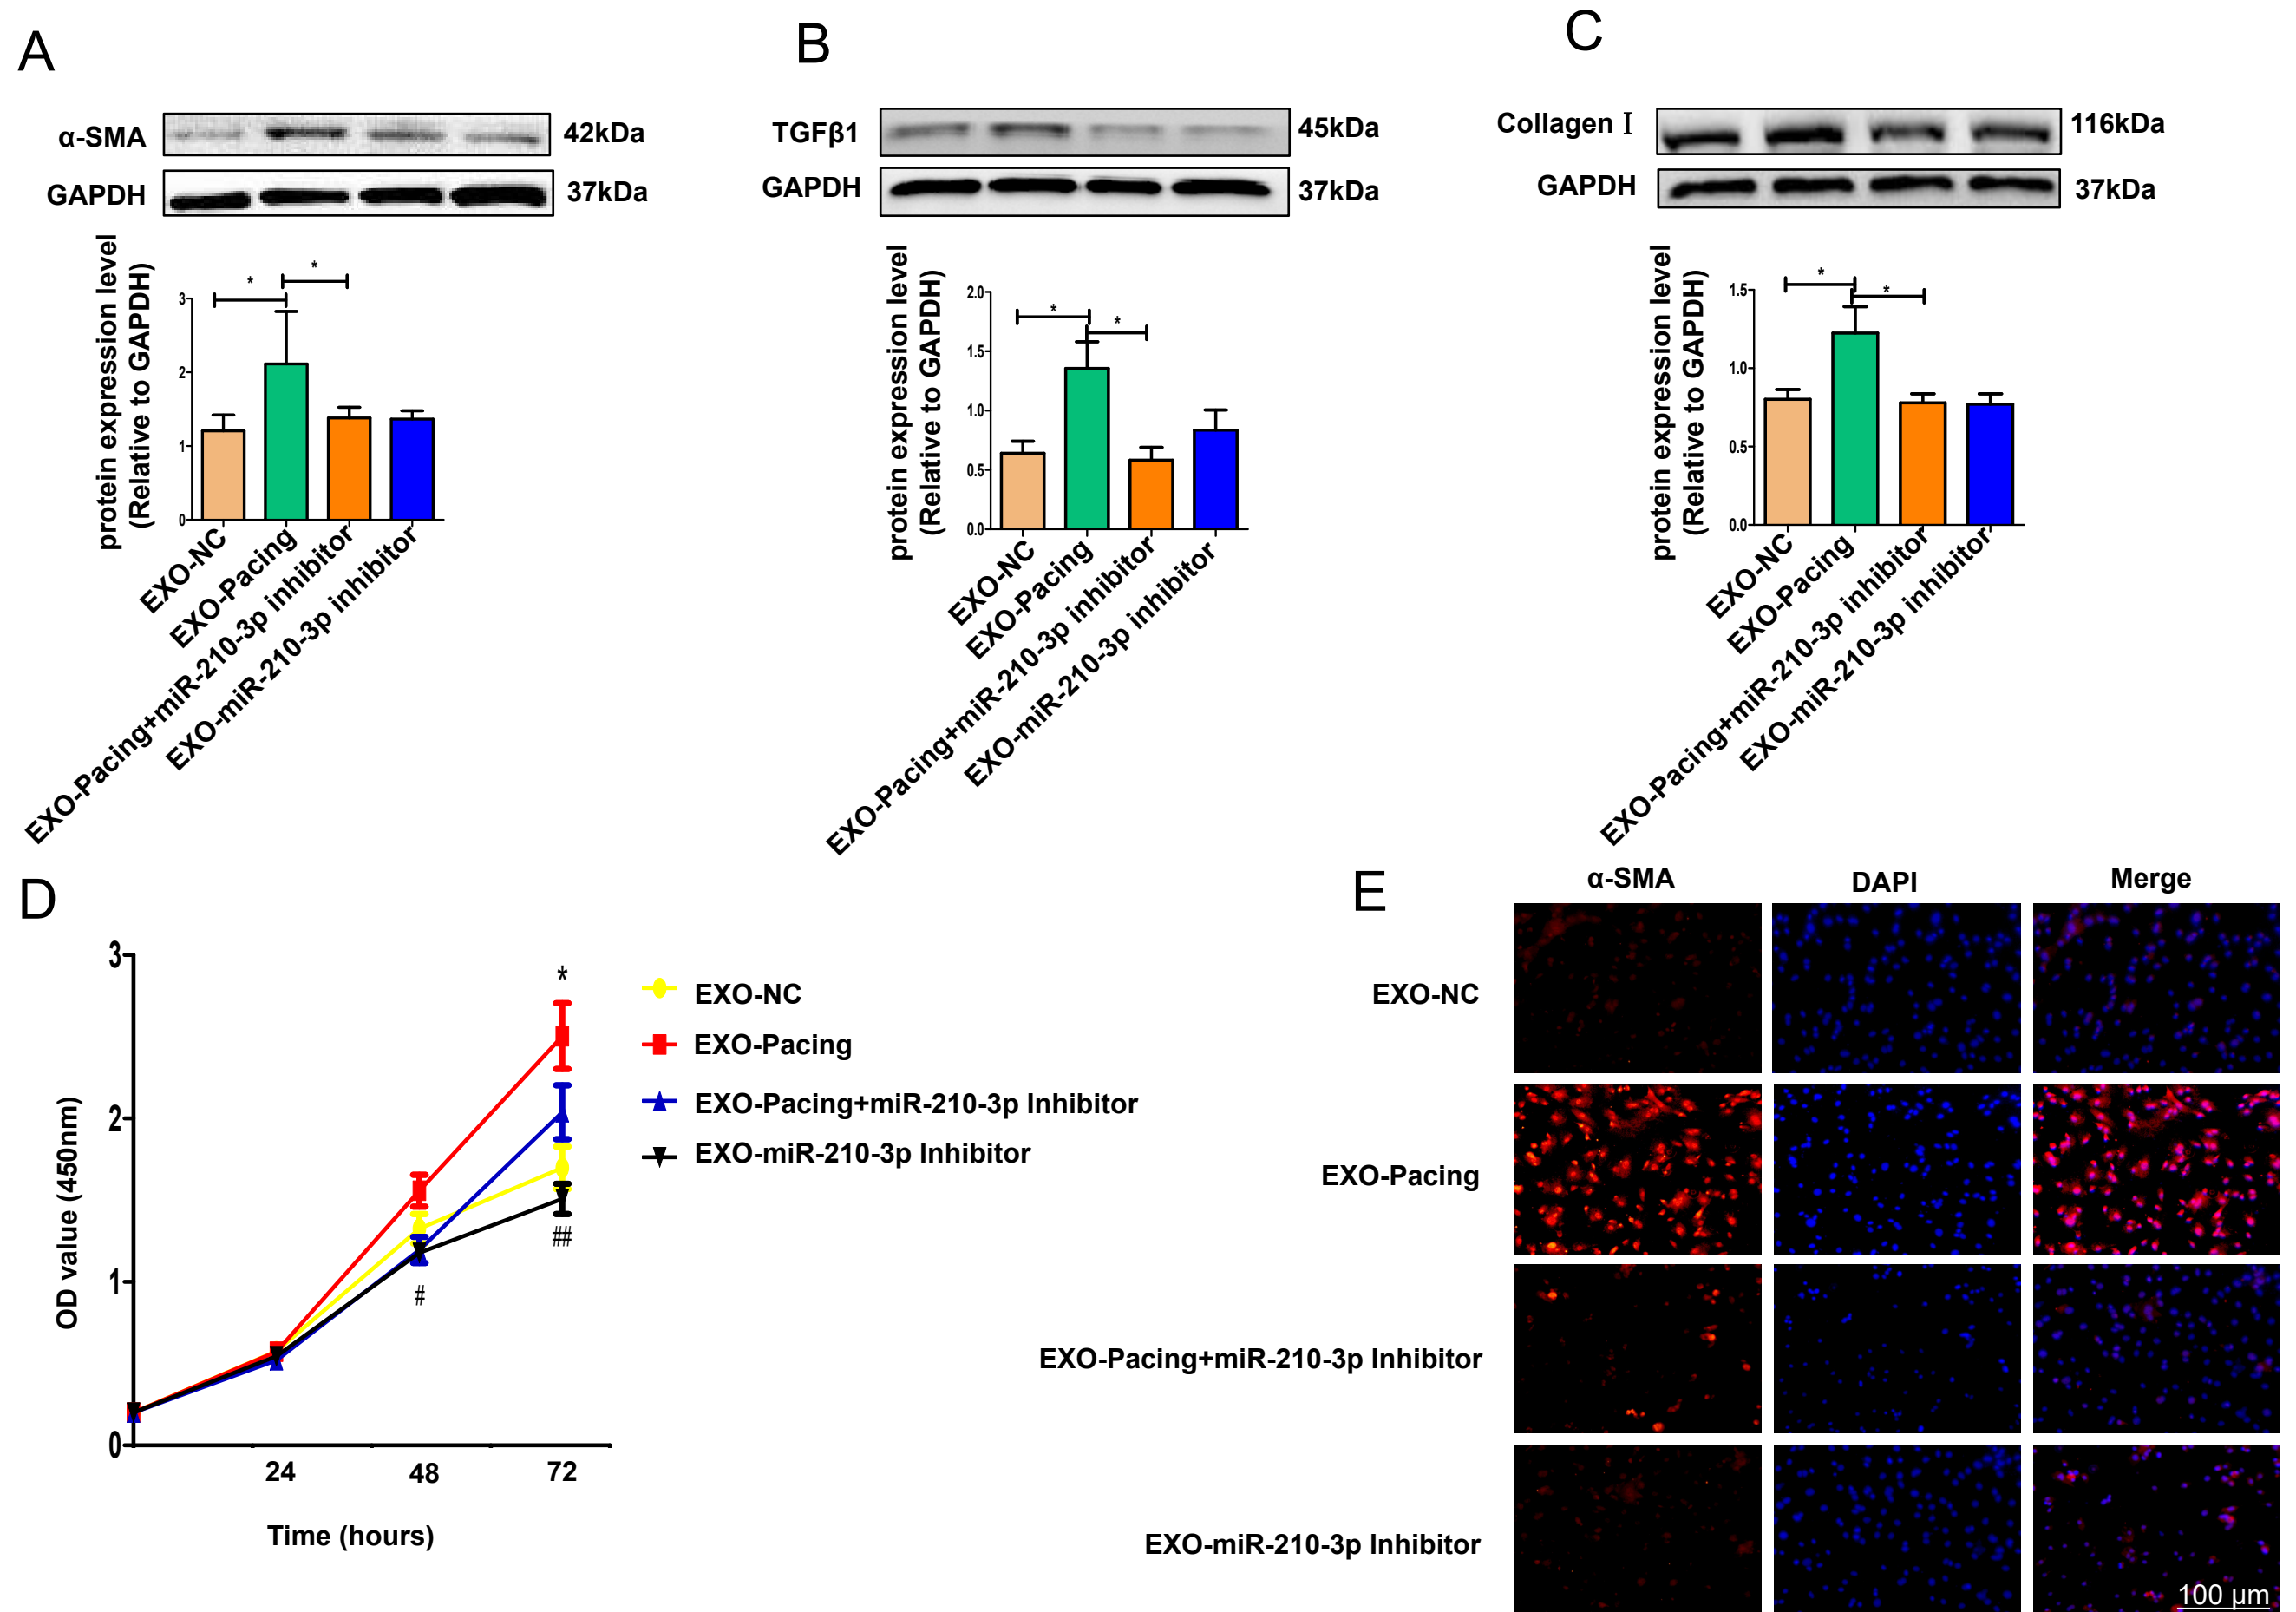

**Exosomal miR-210-3p derived from atrial myocytes promotes atrial fibroblast proliferation and activation.** (A-C) Western blot analysis of protein levels in atrial fibroblasts treated with atrial myocyte-derived exosomes (\* $P$ <0.05). (D) CCK-8 assay to detect the proliferation of atrial fibroblasts treated with atrial myocyte-derived exosomes (\* $P$ <0.05 compared with EXO-NC, and # $P$ <0.05 and ## $P$ <0.01 compared with EXO-Pacing). (E) Immunofluorescence staining showing the relative expression levels of  $\alpha$ -SMA (red) and DAPI (blue) in atrial fibroblasts. Scale bar: 100 $\mu$ m.



## Supplement figure 6

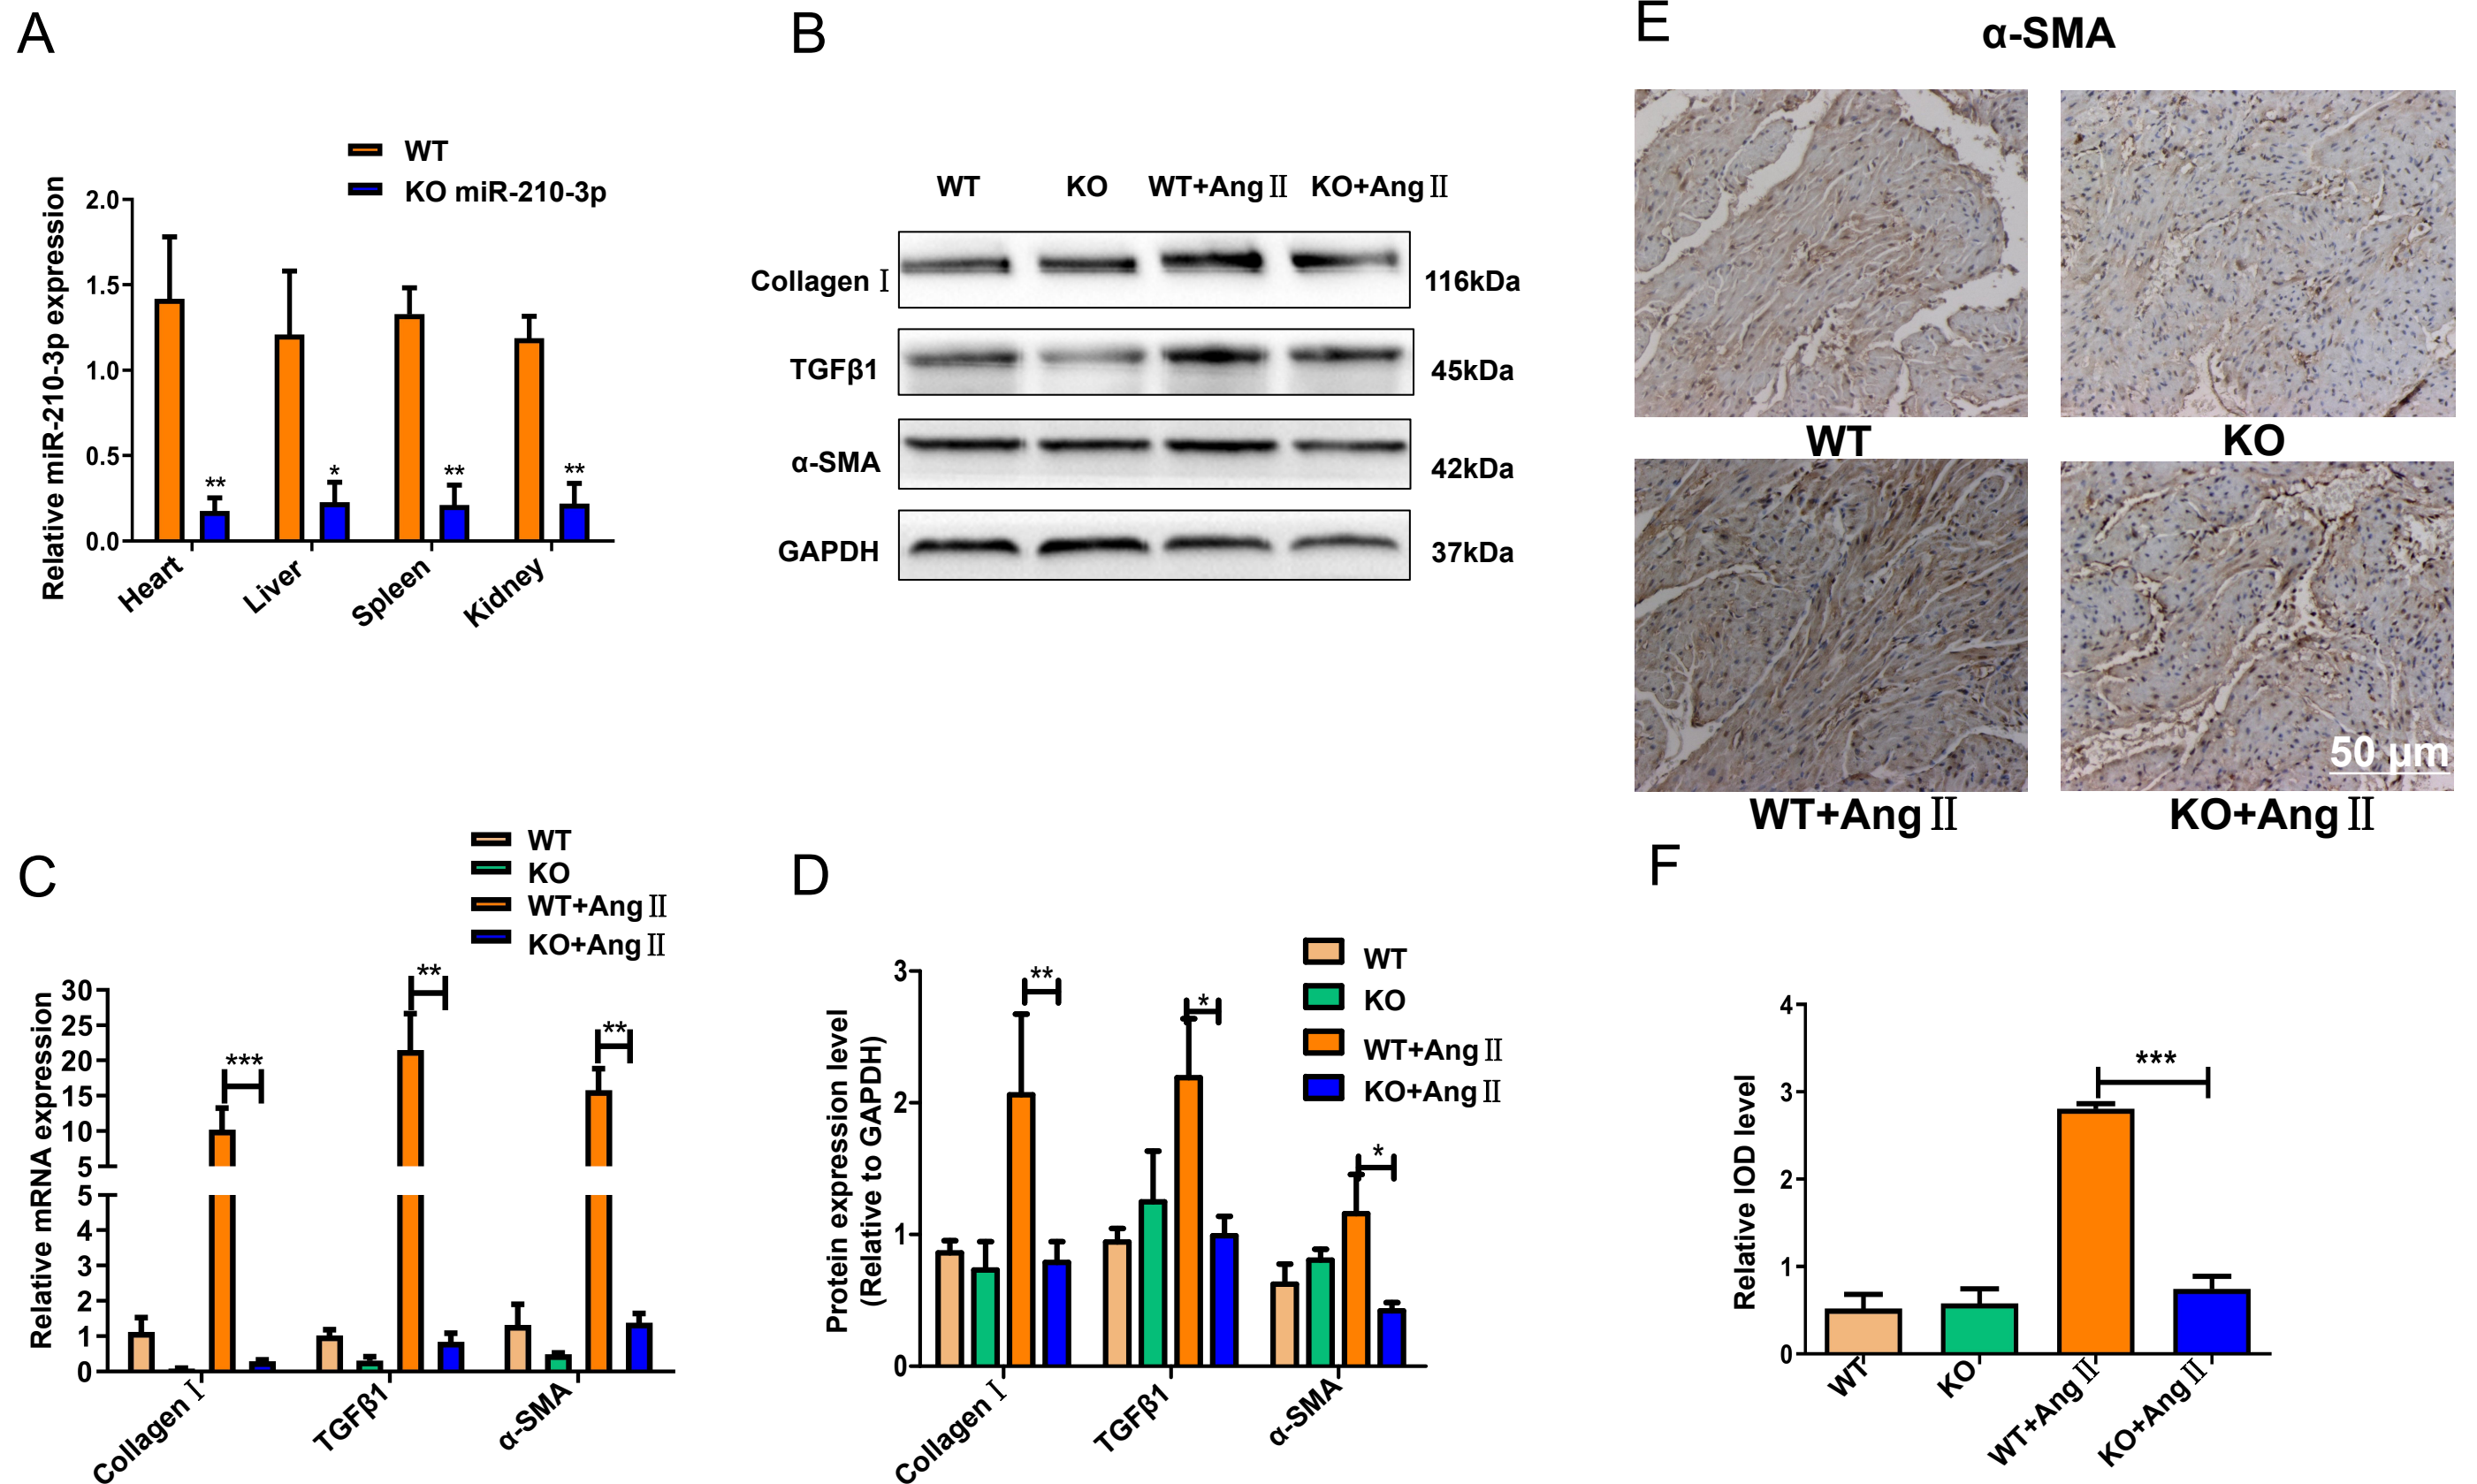

**Effects of miR-210-3p KO on atrial fibrosis in rats.** (A) qRT-PCR analysis of the expression of miR-210-3p in various organs of rats (n=7; \*P<0.05 and \*\*P<0.01 compared with the WT group). (B, D) Western blot analysis of TGFβ1, α-SMA and Collagen I expression levels in atrial tissues (n=7; \*P<0.05 and \*\*P<0.01 compared with the KO+Ang II group). (C) qRT-PCR analysis of TGFβ1, α-SMA and Collagen I expression levels in atrial tissues (n=7; \*\*P<0.01 and \*\*\*P<0.001 compared with the KO+Ang II group). (E, F) Immunohistochemical staining for α-SMA; scale bar: 50 μm (n=7; \*\*\*P<0.001 compared with the KO+Ang II group).

A

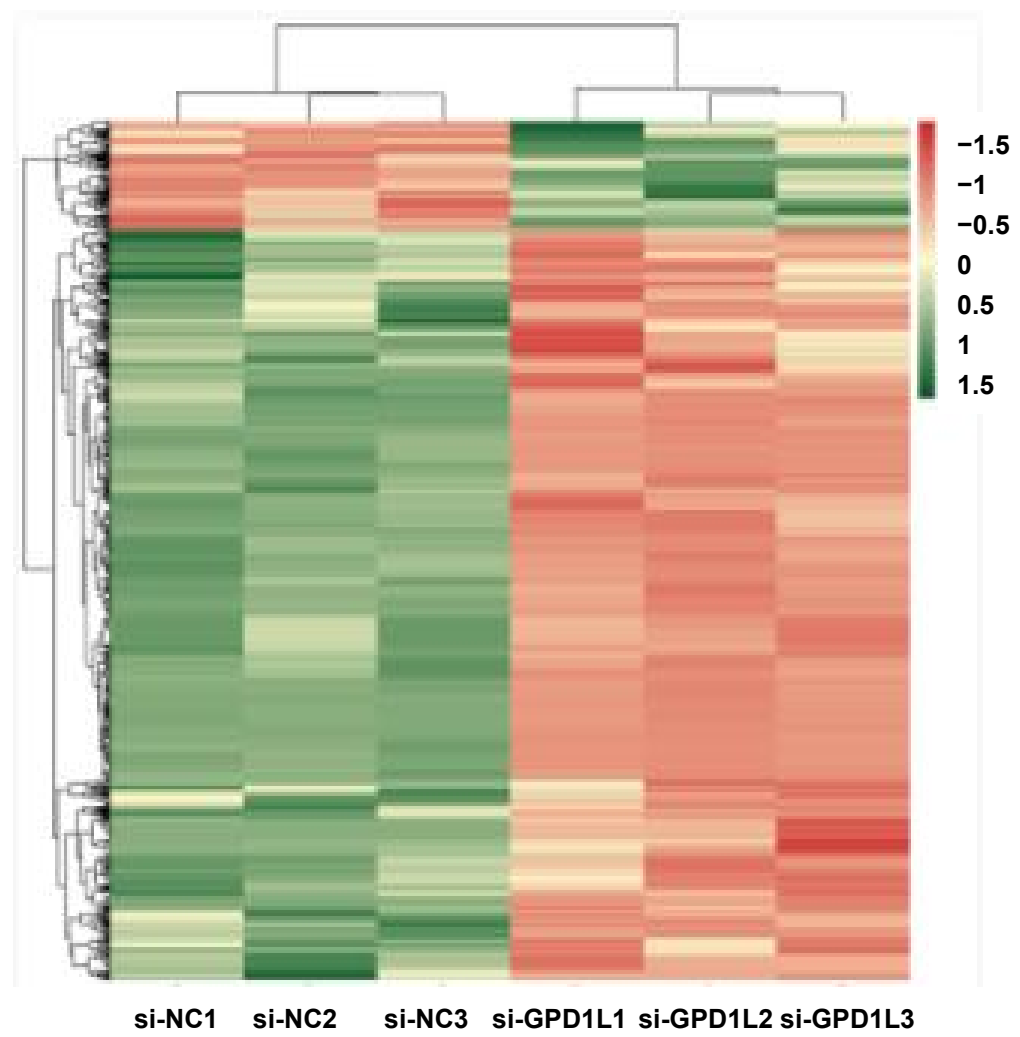

B

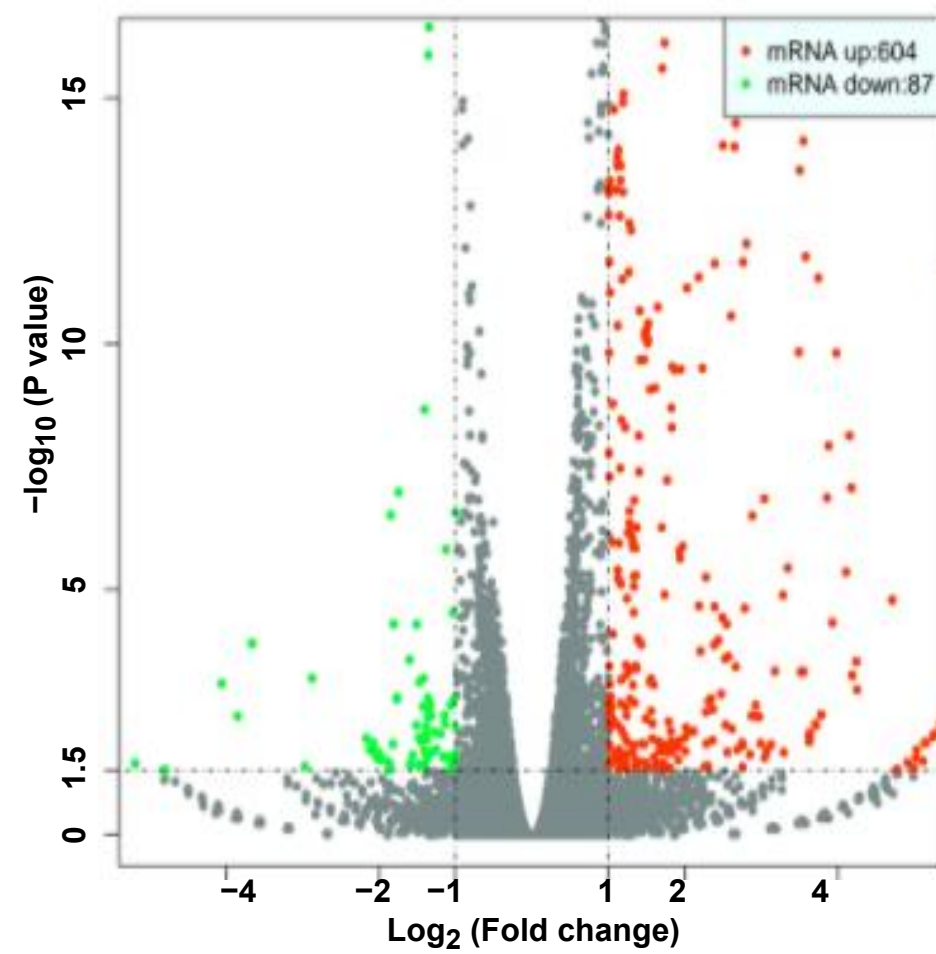

**RNA sequencing analysis.** (A, B) RNA-Seq analysis of differentially expressed mRNAs showing that GPD1L regulates atrial fibroblast proliferation and activation.

# Supplement figure 8

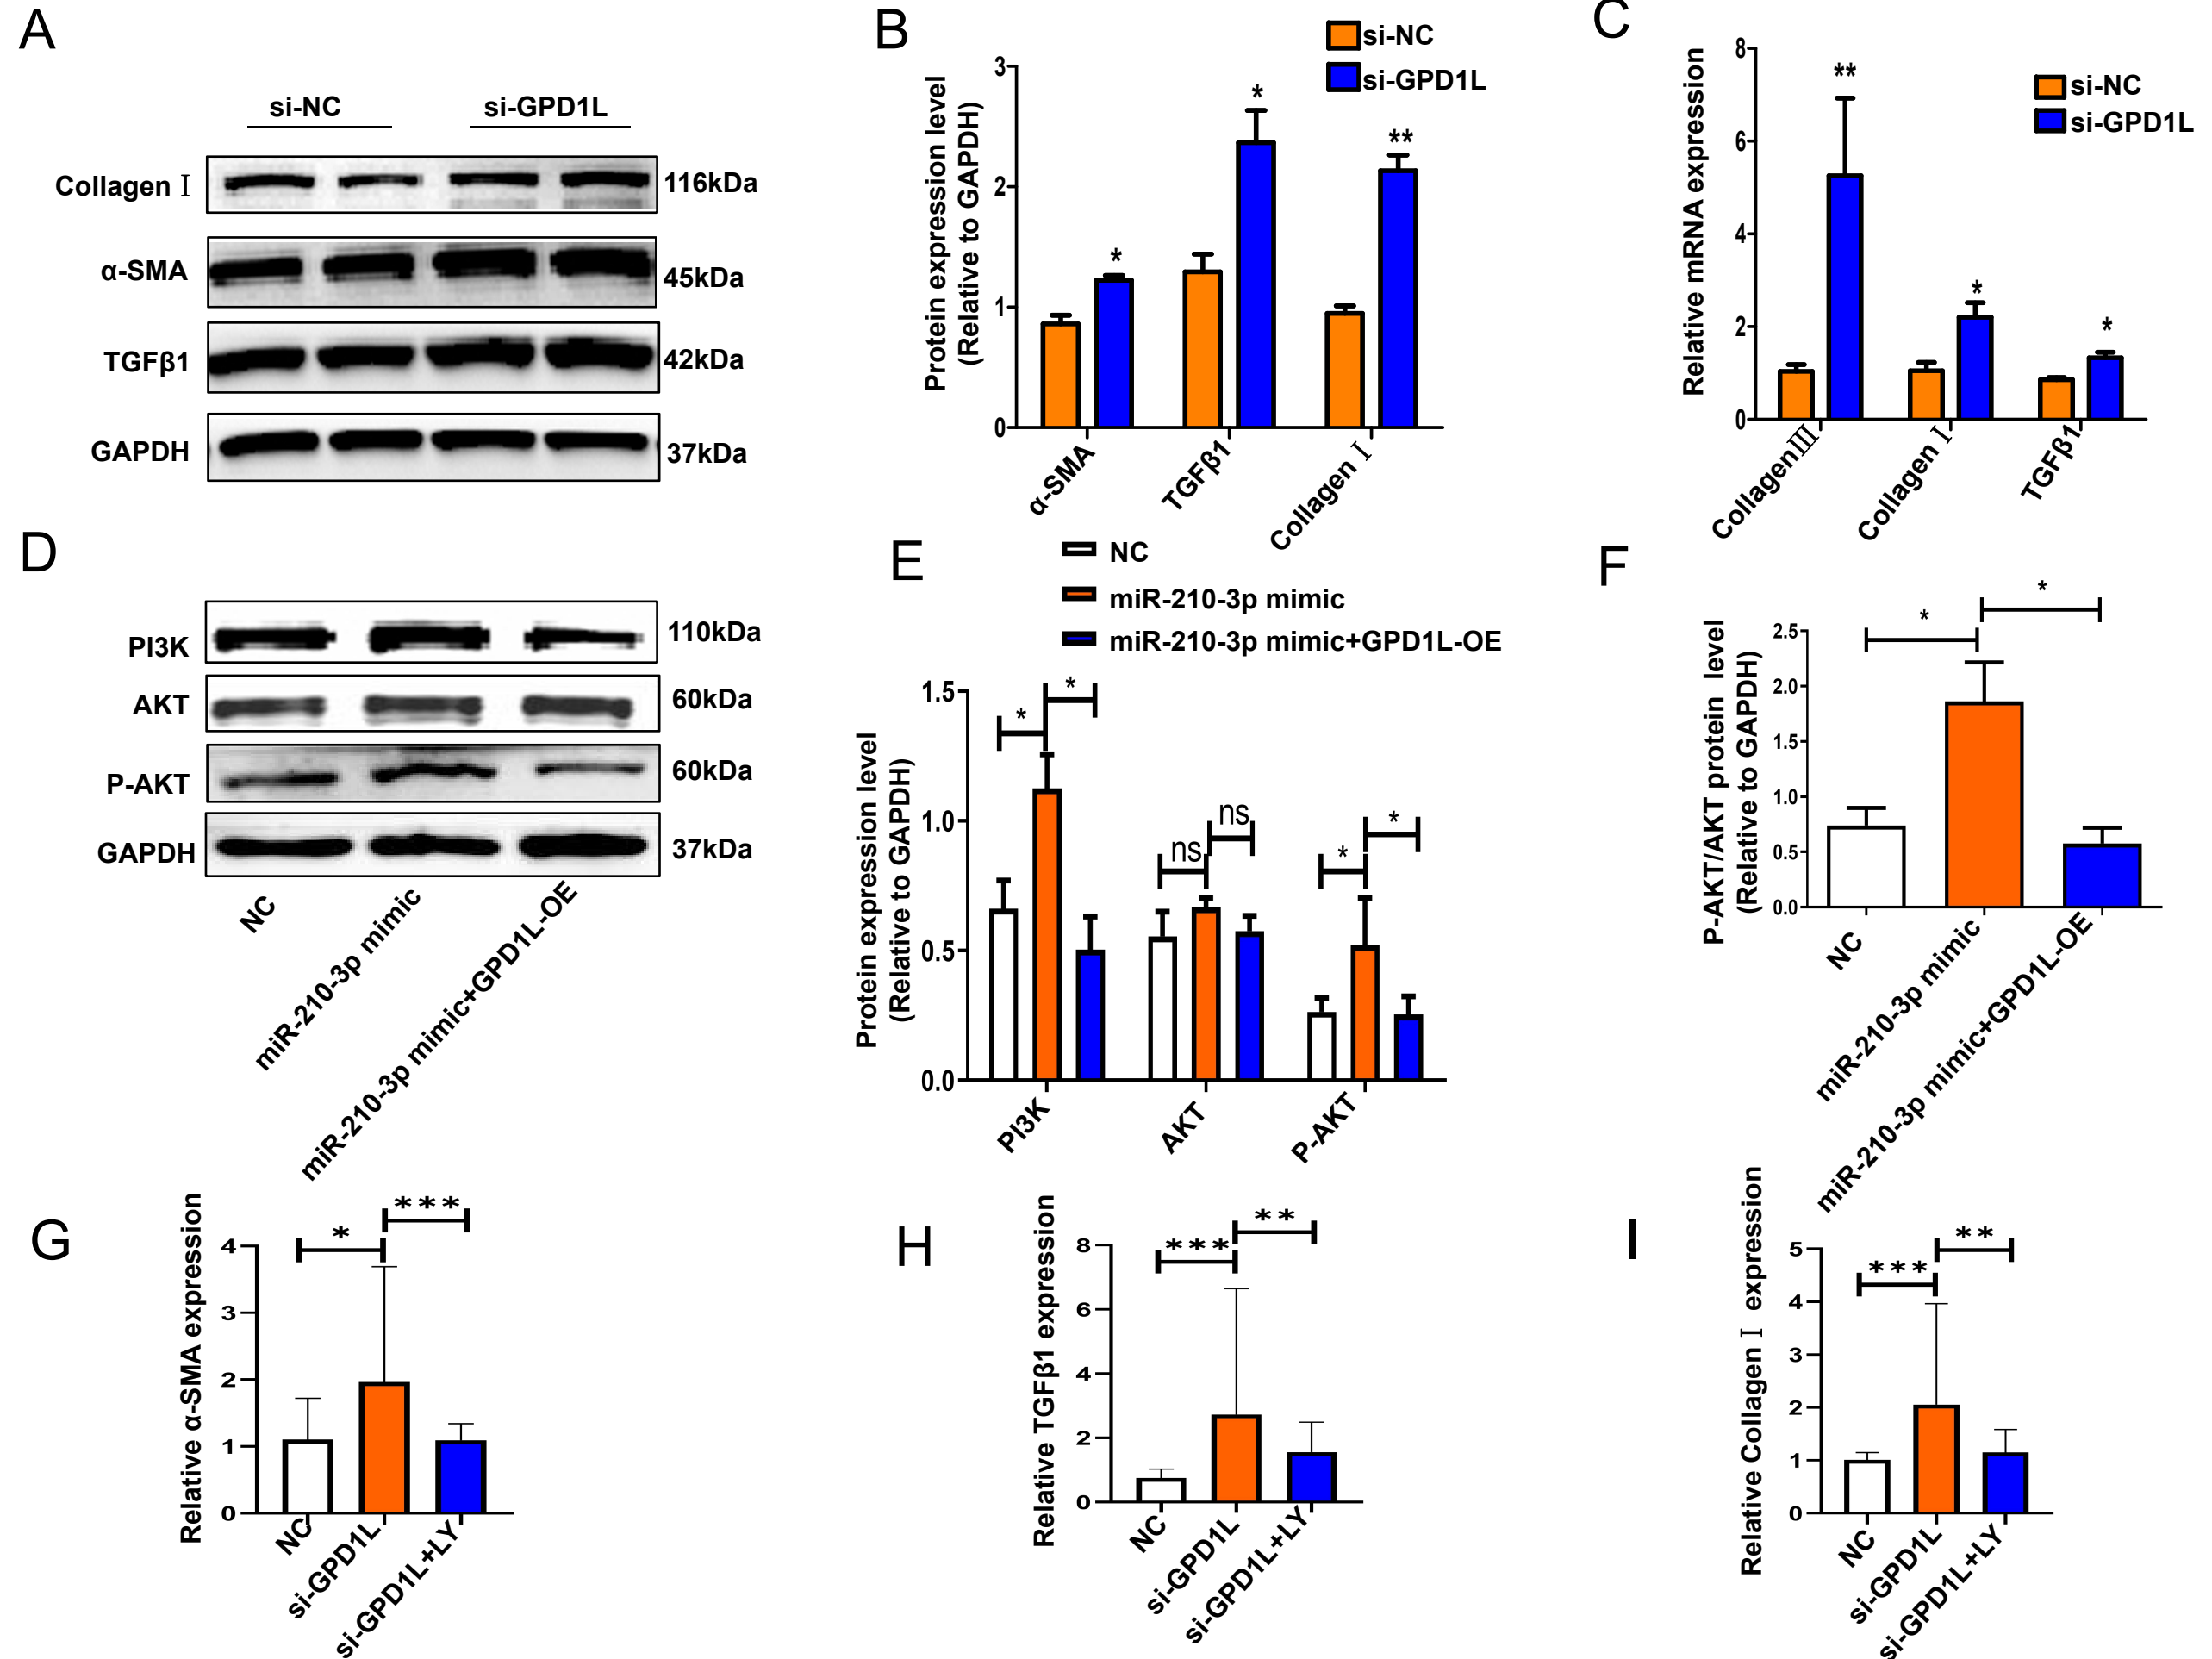

**miR-210-3p promotes proliferation and collagen synthesis by targeting GPD1L/PI3K/AKT.** The expression levels of proteins (A, B) and mRNAs (C) in the si-NC and si-GPD1L groups (\*P<0.05 and \*\*P<0.01). (D, E) Western blot analysis of PI3K, p-AKT and AKT levels in atrial fibroblasts (\*P<0.05). (F) The ratio of p-AKT/AKT levels (\*P<0.05). (G-I) qRT-PCR analysis of  $\alpha$ -SMA, collagen I and TGF $\beta$ 1 expression in atrial fibroblasts (\*P<0.05, \*\*P<0.01, and \*\*\*P<0.001).
